# Supplementary material for: Resident vs nonresident multipotent mesenchymal stromal cell interactions with B lymphocytes result in disparate outcomes
Source: PubMed Central journal article supplement (PMC8046079; doi:10.1002/sctm.20-0289), 2021-01-28

# Supplementary Figure 1

A

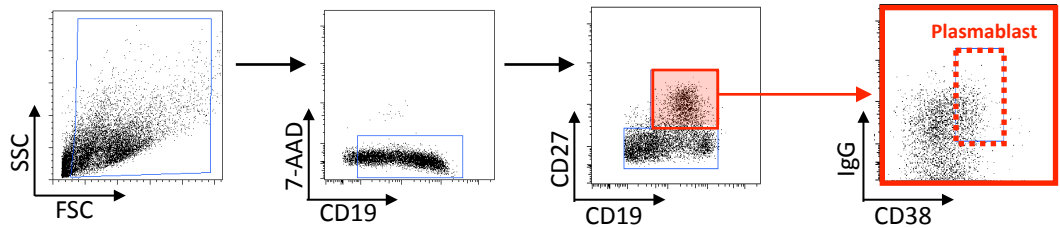

B

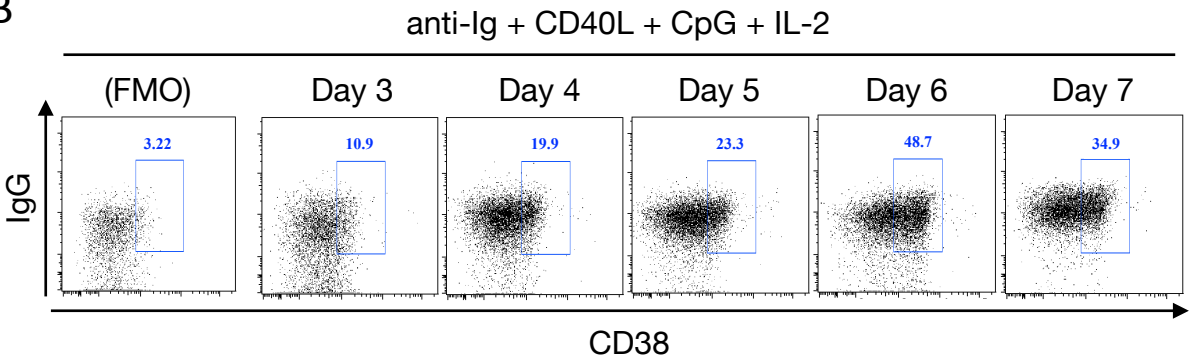

C

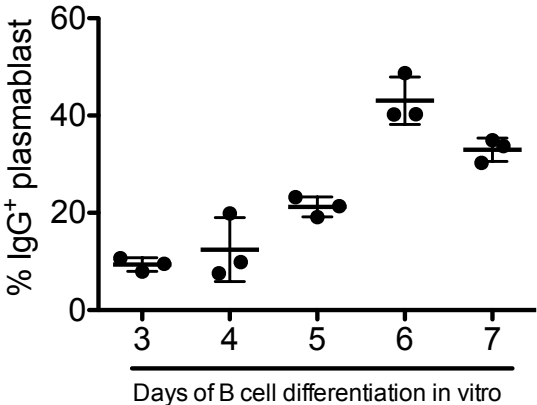

# Supplementary Figure 2

A

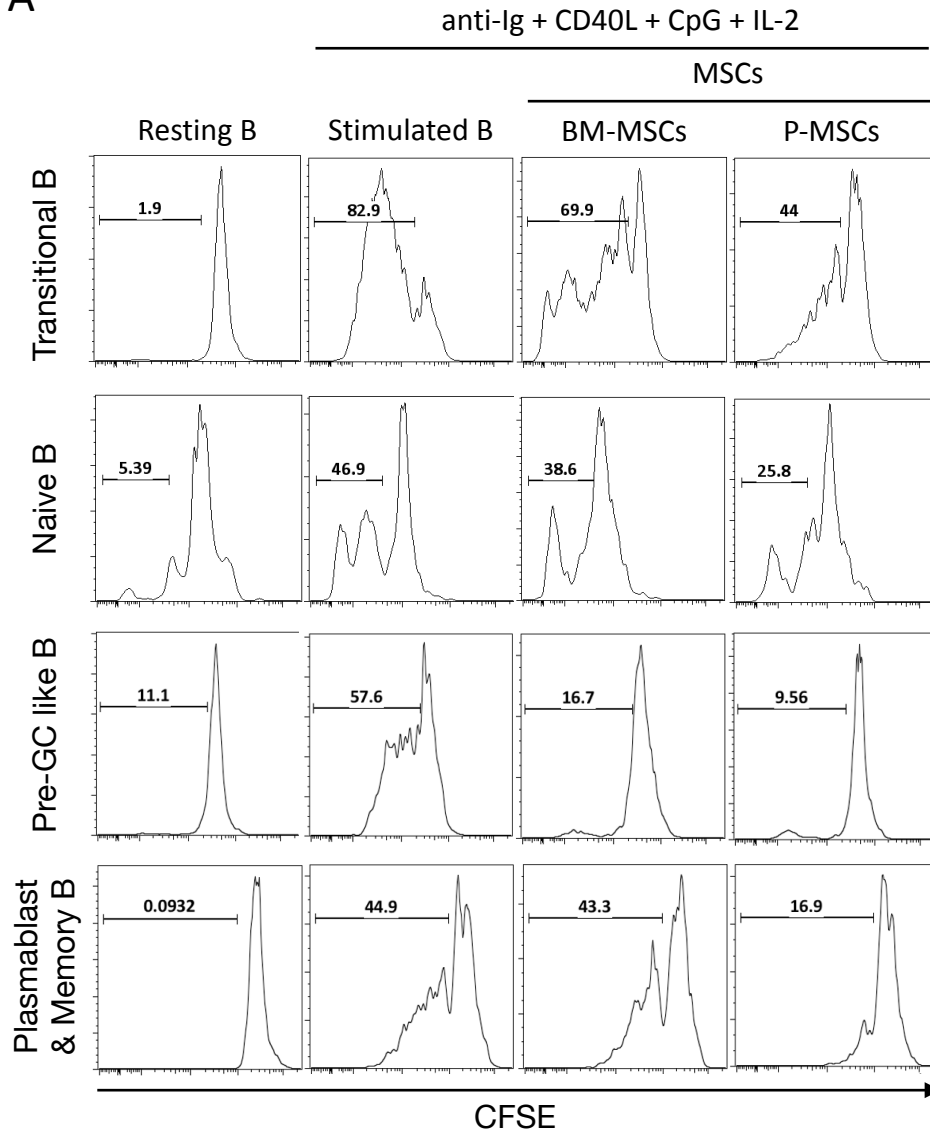

B

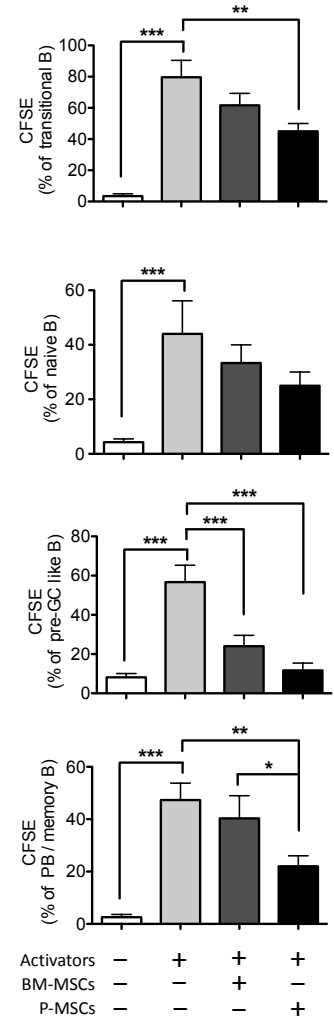

# Supplementary Figure 3

## A Transitional B cells (CD19<sup>+</sup> CD27<sup>-</sup> CD38<sup>hi</sup> CD24<sup>hi</sup> IL-10<sup>+</sup>)

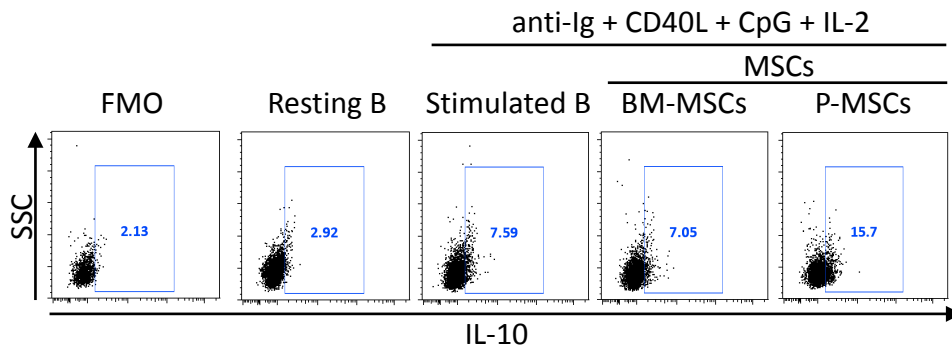

## B CD19<sup>+</sup> CD27<sup>+</sup> CD24<sup>hi</sup> IL-10<sup>+</sup> B cells

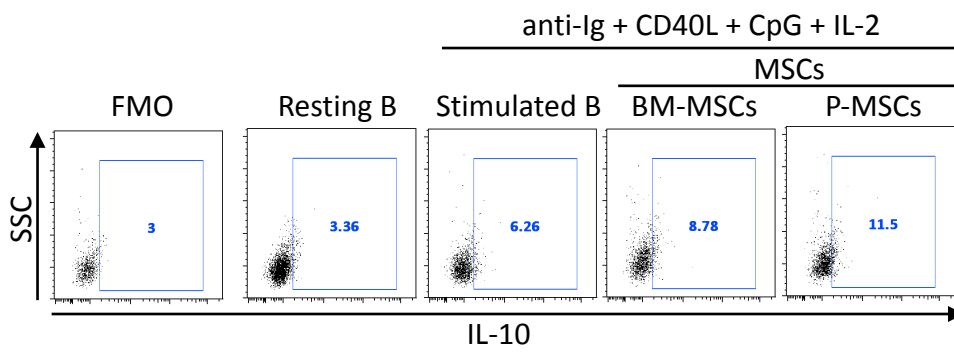

## C Plasmablasts (CD19<sup>+</sup> CD27<sup>+</sup> CD38<sup>hi</sup> IL-10<sup>+</sup>)

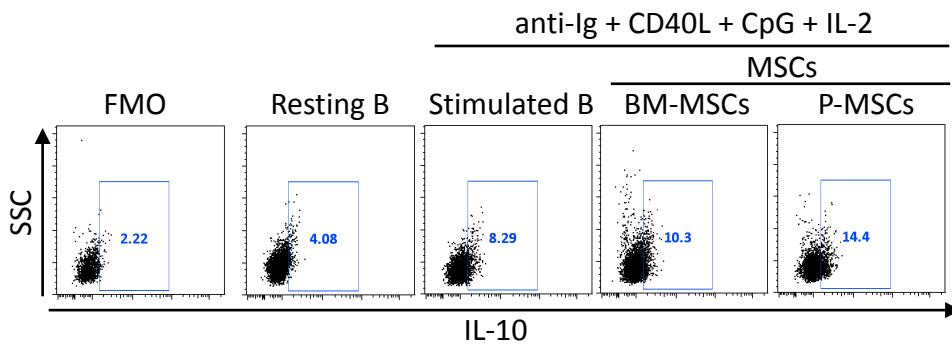

# Supplementary Figure 4

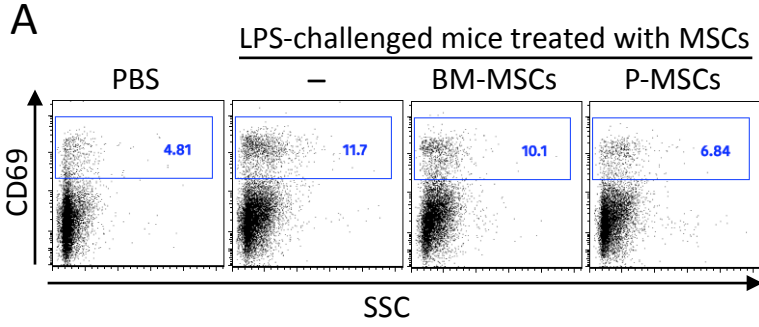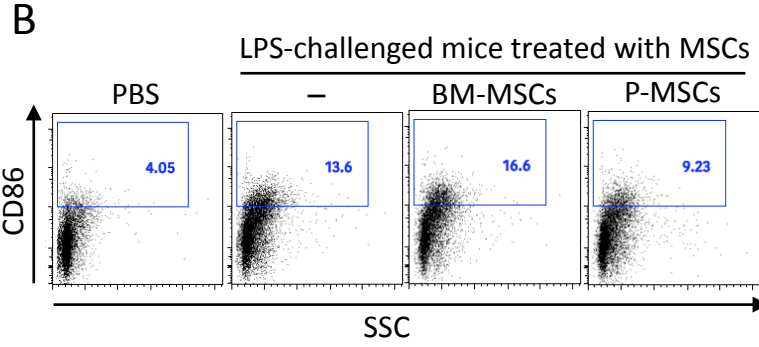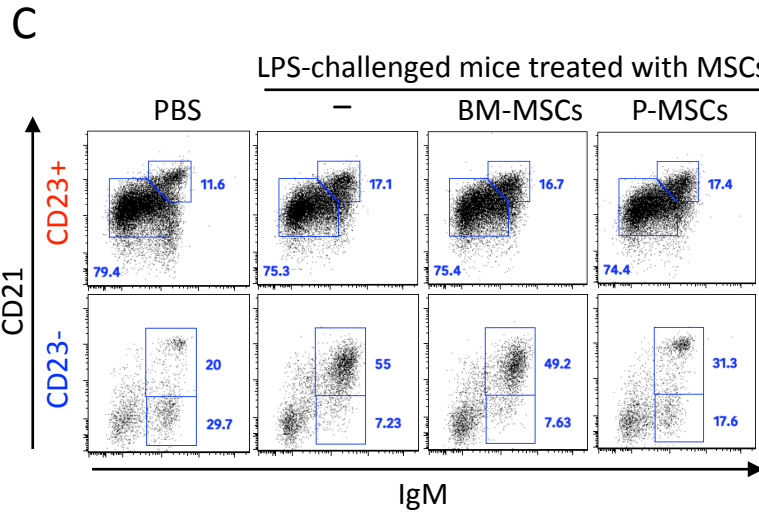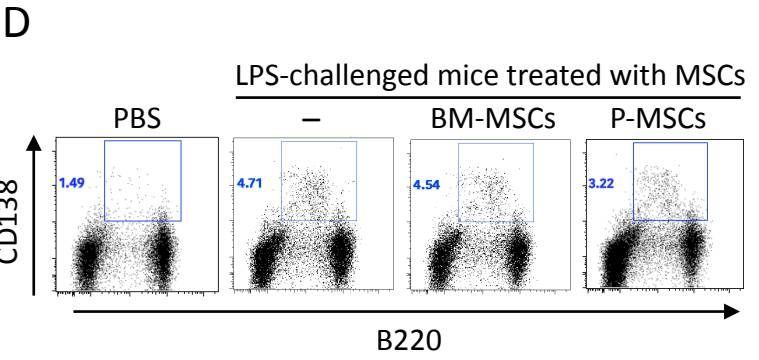

# Supplementary Figure 5

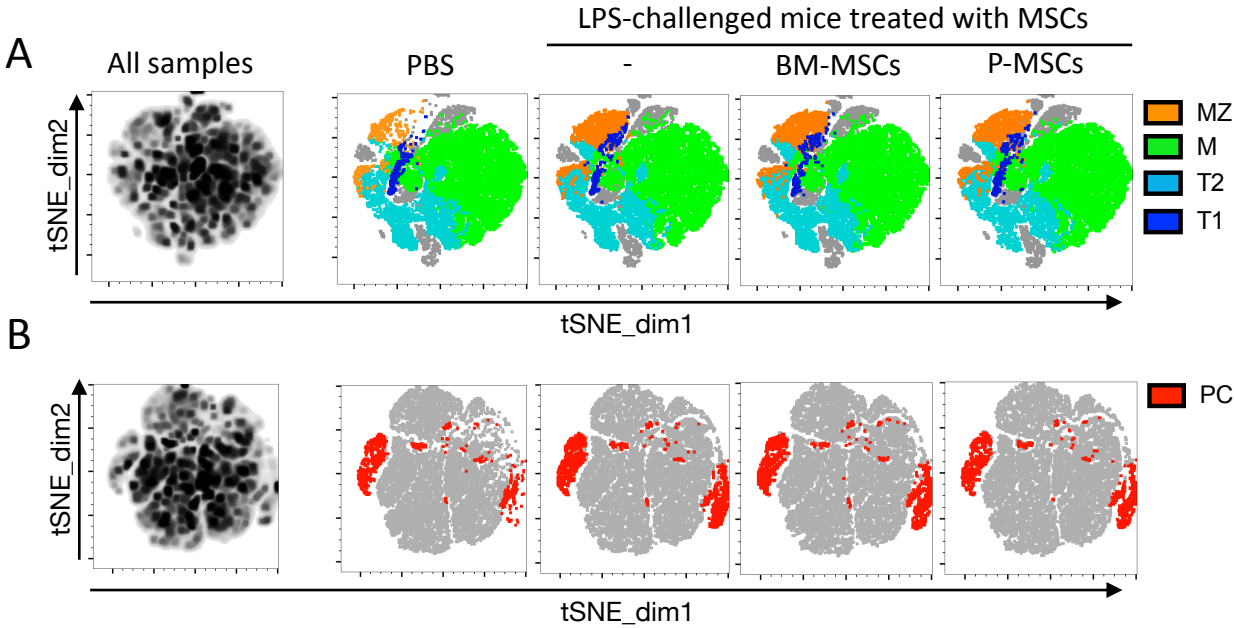

# Supplementary Figure 6

## A T2-MZP subset (CD19+ CD23+ IgM<sup>hi</sup> CD21<sup>hi</sup> IL-10<sup>+</sup>)

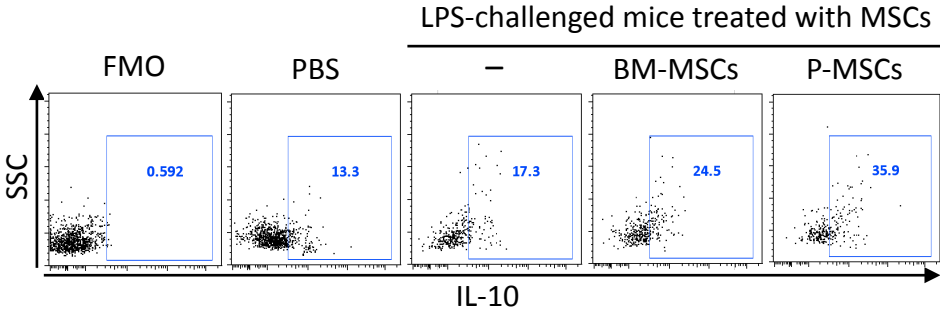

## B MZ B subset (CD19+ CD23- IgM<sup>hi</sup> CD21<sup>hi</sup> IL-10<sup>+</sup>)

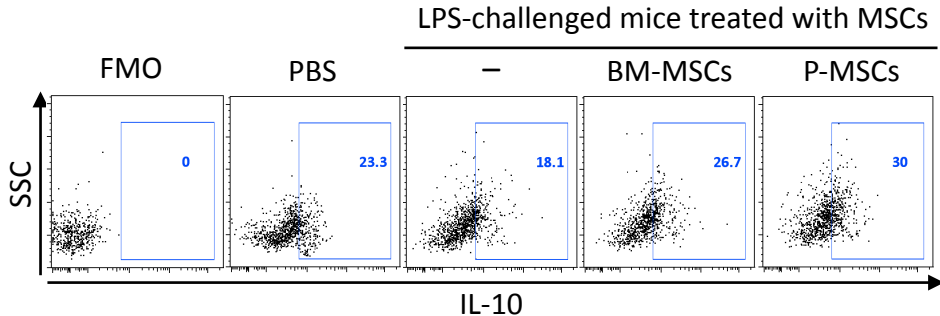

Supplement: SCT3-10-711-s001.pdf [file SCT3-10-711-s001.pdf]
